# Supplementary material for: Slug Controls Stem/Progenitor Cell Growth Dynamics during Mammary Gland Morphogenesis
Source: PubMed Central journal article supplement (PMC3531397; doi:10.1371/journal.pone.0053498), 2012-12-27
Supplement: pone.0053498.s005.pdf [file pone.0053498.s005.pdf]

## Antibody origin and methodology

| <b>Antibody</b> | <b>Origin</b>                   |
|-----------------|---------------------------------|
| Alexa Fluor 488 | InVitrogen 1/750                |
| Alexa Fluor 555 | InVitrogen1/750                 |
| Caspase 3       | CST 1/100                       |
| CD24-PE         | Clone M1/69 ; BD Pharmingen     |
| CD31-APC)       | Clone MEC13.3; Biolegend        |
| CD45-APC        | Clone 30-F11; Biolegend         |
| CD49f-FITC      | CloneGoH3 ; BD Pharmingen 1/100 |
| Cytokeratin 5   | Covance1/1000                   |
| Cytokeratin 8   | Covance1/100                    |
| GFP             | Abcam 1/3000 (Western)          |
| KI67            | Abcam Ab15580 1/100             |
| Pcna1           | Santa Cruz SC56 1/100           |
| P-cadherin      | Zymed 1/100 (1/1000 Western)    |
| Slug            | CST 1/100 (1/1000 Western)      |
| SMA             | Dako 1/100                      |
| Tubulin         | Abcam 1/5000 Western            |
